# Supplementary figures and images for: Interaction of extrinsic chemical factors affecting photodegradation of dissolved organic matter in aquatic ecosystems
Source: Royal Society of Chemistry journal article supplement (doi:10.1039/c4pp00011k), 2014-03-20

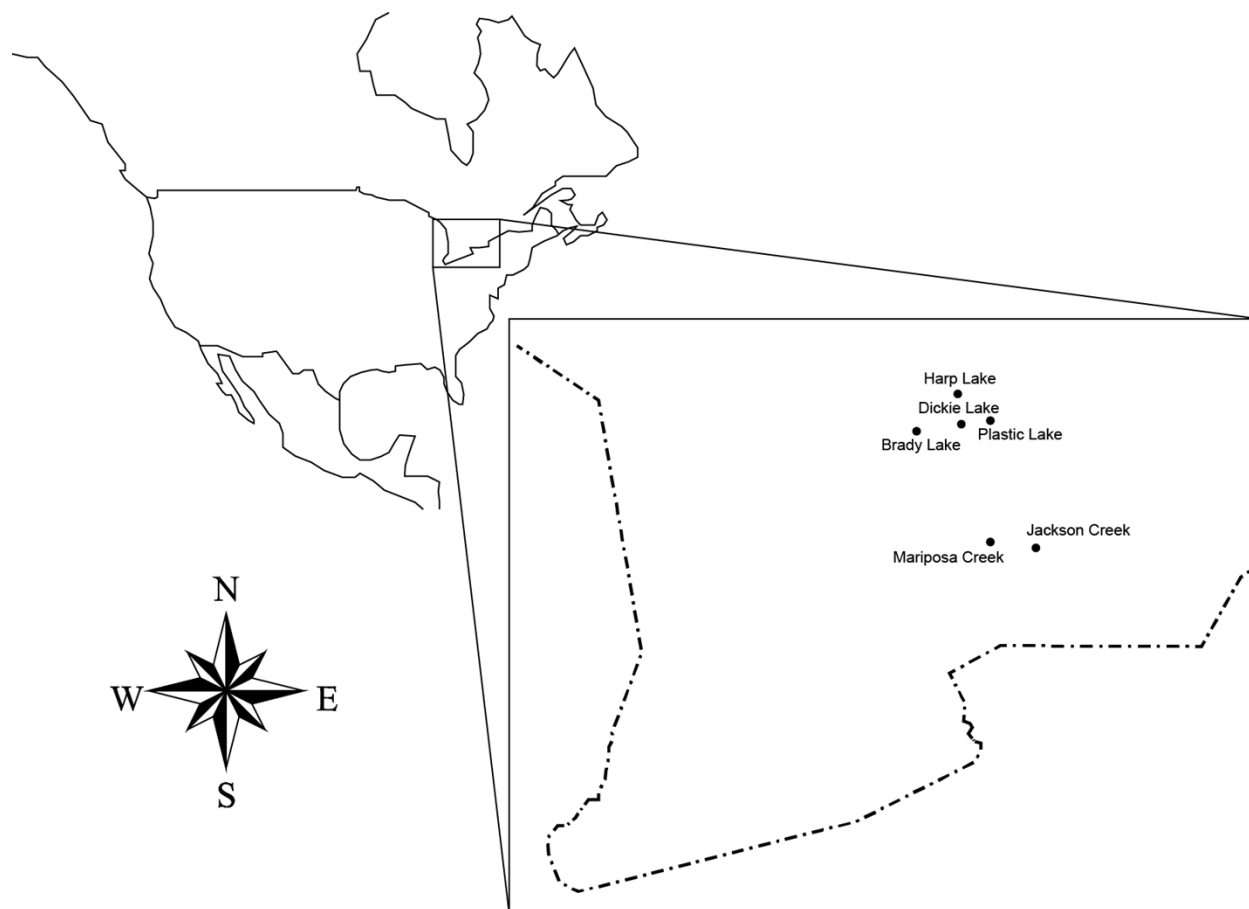

Figure SI-1 Sampling sites locations.

Supplement: c4pp00011k1.pdf [file c4pp00011k1.pdf]
